# Supplementary material for: Synthesis of chiral hybrid nanotubes of magnetite nanoparticles and conducting polymers
Source: Royal Society of Chemistry journal article supplement (doi:10.1039/c1nr11312g), 2011-10-28
Supplement: c1nr11312g.pdf [file c1nr11312g.pdf]

## Electronic Supplementary Information

# Synthesis of chiral hybrid nanotubes of magnetite nanoparticles and conducting polymer

Masashi Mitsumori, Tsukasa Nakahodo and Hisashi Fujihara\*

*Department of Applied Chemistry, Kinki University,  
Kowakae, Higashi-Osaka 577-8502, Japan.*

- 1) Synthesis of chiral stabilizer **1**.
- 2) EDX spectrum and XPS spectrum of chiral magnetite, **1**-Fe<sub>3</sub>O<sub>4</sub> NPs.
- 3) SEM image of chiral hybrid nanotubes, (*R*)-**1**-Fe<sub>3</sub>O<sub>4</sub>-PT-NTs.



**Scheme S1.** Reagents and Conditions: (i) Br<sub>2</sub>, CH<sub>2</sub>Cl<sub>2</sub>, 0 °C, 1 h; (ii) NaH, THF, 0 °C, 1 h; (iii) ClCH<sub>2</sub>OCH<sub>3</sub>, THF, room temp., 2 h; (iv) *n*-BuLi, THF, -78 °C, 2 h; (v) DMF, THF, room temp., 6 h; (vi) LiAlH<sub>4</sub>, THF, 0 °C, 2 h; (vii) Et<sub>3</sub>N, CH<sub>2</sub>Cl<sub>2</sub>, 0 °C, 2 h; (viii) CH<sub>3</sub>SO<sub>2</sub>Cl, CH<sub>2</sub>Cl<sub>2</sub>, room temp., 16 h; (ix) NaH, THF, 0 °C, 1 h; (x) (*R*)- or (*S*)-**2**, THF, reflux, 8 h; (xi) 12*N*-HCl/*i*-Pr-OH, CH<sub>2</sub>Cl<sub>2</sub>, room temp., 7 h; (xii) K<sub>2</sub>CO<sub>3</sub>, MeOH, 0 °C, 2 h; (xiii) BrCH<sub>2</sub>COOH, MeOH, reflux, 12 h.

(*R*)-**1** : FT-IR (cm<sup>-1</sup>, KBr) 1731; <sup>1</sup>H-NMR (400 MHz, CD<sub>2</sub>Cl<sub>2</sub>) δ 2.95 (t, *J* = 6.8 Hz, 4H, -CH<sub>2</sub>-CH<sub>2</sub>-O-), 3.66 (t, *J* = 6.8 Hz, 4H, Ar-CH<sub>2</sub>-CH<sub>2</sub>-), 4.50 (ABq, *J* = 16.8 Hz, 4H, -CH<sub>2</sub>-COOH), 4.54 (s, 4H, -CH<sub>2</sub>-CH<sub>2</sub>-O-CH<sub>2</sub>-), 6.88 (dd, *J*<sub>1</sub> = 3.6 Hz, *J*<sub>2</sub> = 5.2 Hz, 2H, Ar-H), 6.92 (dd, *J*<sub>1</sub> = 3.6 Hz, *J*<sub>2</sub> = 5.2 Hz, 2H, Ar-H), 6.94-6.99 (m, 6H, Ar-H), 7.00 (s, 2H, Ar-H), 7.02-7.12 (m, 4H, Ar-H), 7.19 (dd, *J*<sub>1</sub> = 1.2 Hz, *J*<sub>2</sub> = 5.2 Hz, 2H, Ar-H), 7.21 (d, *J* = 9.2 Hz, 2H, Ar-H), 7.71 (s, 2H, Ar-H), 7.84 (d, *J* = 9.2 Hz, 2H, Ar-H); <sup>13</sup>C-NMR (100 MHz, CD<sub>2</sub>Cl<sub>2</sub>) δ 30.1, 66.7, 70.3, 73.0, 115.2, 120.1, 124.0, 124.9, 125.9, 126.0, 126.7, 126.9, 127.2, 128.0, 128.3, 130.1, 130.5, 131.0, 133.6, 135.1, 135.6, 135.7, 136.9, 137.3, 153.1, 177.3; MS (FAB) *m/z* 1010 (M<sup>+</sup>).

The CD spectrum of (*R*)-**1** is shown in Fig. S1-1.

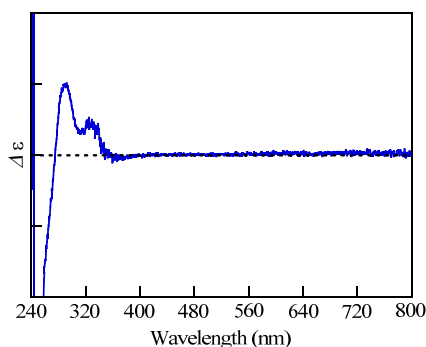

**Fig. S1-1.** CD spectrum of (*R*)-**1** in CHCl<sub>3</sub>.

## 2) EDX spectrum and XPS spectrum of chiral magnetite, 1-Fe<sub>3</sub>O<sub>4</sub> NPs.

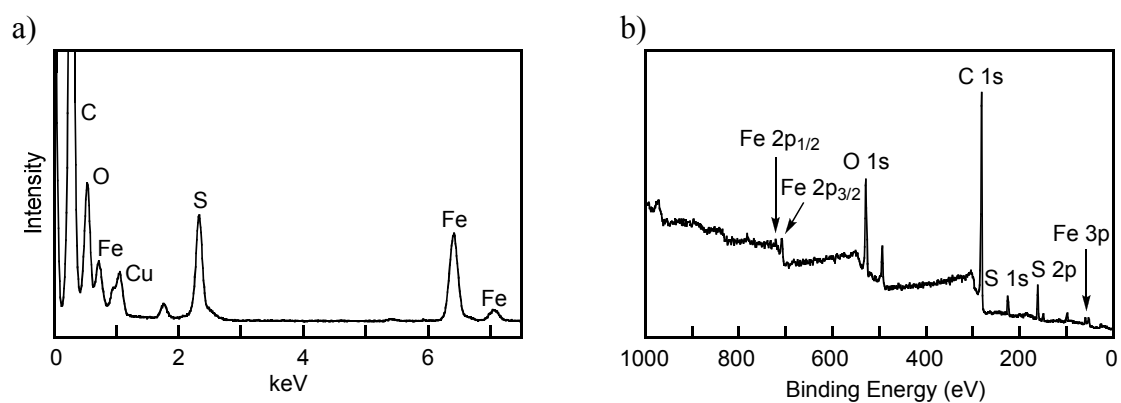

**Fig. S1.** (a) EDX spectrum and (b) XPS spectrum of (*R*)-1-Fe<sub>3</sub>O<sub>4</sub> NPs. (a) Cu peak of EDX spectrum is from the supporting copper grid.

## 3) SEM image of chiral hybrid nanotubes, (*R*)-1-Fe<sub>3</sub>O<sub>4</sub>-PT-NTs.

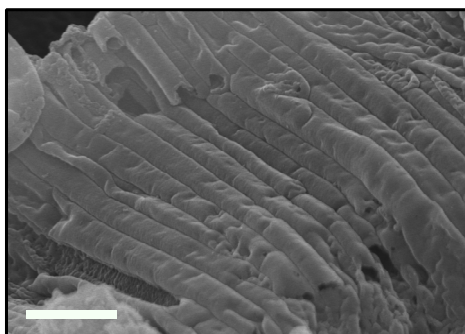

**Fig. S2.** SEM image of (*R*)-1-Fe<sub>3</sub>O<sub>4</sub>-PT-NTs. Scale: 500 nm.
